# Supplementary material for: Transcriptional Responses of Fusarium graminearum Interacted with Soybean to Cause Root Rot
Source: MDPI journal article supplement (doi:10.3390/jof7060422), 2021-05-27
Supplement: s1 [file s1]

## Supplementary material Table S1

**Table S1:** Primers used for the validation of selected genes in qRT PCR.

| Primer Name                    | Primer sequence                               | Product length |
|--------------------------------|-----------------------------------------------|----------------|
| <i>FGSG_02324</i>              | TCAAGCTCCTCGGGTGACGA<br>TTTGGGCCCCATGCTGTTGT  | 252            |
| <i>FGSG_09512</i>              | AGGATGGCTGGAGCCCAAGA<br>CGAACTCGGCTGGCTCGAAA  | 215            |
| <i>FGSG_02202</i>              | AACACCGACAACGGCTTCGT<br>GCCTTGACCTTGCGGACTT   | 101            |
| <i>FGSG_07558</i>              | AAGGGTTGCTGGCACTACGC<br>TGAAGCGGAGCATGCCAGAG  | 103            |
| <i>FGSG_02327</i>              | TCGACCGAGTGATTGGCTCT<br>CTGGCCAAGCCTTTCGCTTA  | 162            |
| <i>FGSG_07500</i>              | CCGTCATCCGCCAAGTCCTC<br>CGAGCGTCGTGTTTTTCGCAC | 233            |
| <i>FGSG_03120</i>              | ACGACACTCTTGCTGGTGCC<br>CAGCCAGCCTTGTGGGTGAA  | 181            |
| <i>FGSG_06397</i>              | TACTCTTCCCCGGCCCCAA<br>GCCTCCTCGGAAGGCTTGAC   | 152            |
| <i>FGSG_06596</i>              | GCTACAACACGGCCAAGGG<br>GTCATCCGCAGCCTCAGCAA   | 167            |
| <i>FGSG_02925</i>              | CACGGTTCTCACCAGCAGCA<br>GTCCAACGGGGTCCTTGTGG  | 142            |
| <i>EF1-<math>\alpha</math></i> | TGGCAAGTCGACCACTACCG<br>GGTGATAACCACGCTCACGCT | 163            |

Note: Primers were designed at NCBI for each gene and elongation translation factor gene (*EF1- $\alpha$* ) was used as reference primer for normalization in qRT-PCR.
